# Supplementary material
Source: PubMed Central journal article supplement (PMC7428213)
Supplement: cmr.2019.1497.suppl.pdf [file cmr.2019.1497.suppl.pdf]

# Mortality of Patients Requiring Escalation to Intensive Care within 24 Hours of Admission in a Mixed Medical-Surgical Population

Jason Leong, MD; Jai Madhok, MD, MSE; and Geoffrey K. Lighthall, MD, PhD

## Supplemental Data

doi:10.3121/cmr.2019.1497.suppl

**Table S1.** Crude mortality of patients in different age categories

| Age Strata | Mortality |        |        | n    |
|------------|-----------|--------|--------|------|
|            | 30 day    | 90 day | 1 year |      |
| 18-40      | 3.80%     | 4.80%  | 6.70%  | 104  |
| 41-55      | 4.40%     | 6.50%  | 13.30% | 384  |
| 56-75      | 8.30%     | 11.50% | 18.30% | 2467 |
| 76-85      | 18.10%    | 23.90% | 29.90% | 653  |
| > 85       | 23.30%    | 28.50% | 41.50% | 253  |

**Table S2.** Association between key admission characteristics and mortality of medical and surgical ICU patients at 1 year

| Variable                 | All Patients<br>n (%) | <i>P</i> * | Surgical Patients<br>n (%) | <i>P</i> * | Medical Patients<br>n (%) | <i>P</i> * |
|--------------------------|-----------------------|------------|----------------------------|------------|---------------------------|------------|
| 24-hr indirect admission | 125/474 (26)          | 0.0008     | 33 (18) vs. 249 (11)       | 0.003      | 92 (31) vs. 415 (41)      | 0.003      |
| Code blue                | 44/65 (68)            | <0.0001    | 7 (64) vs. 275 (11)        | <0.0001    | 37 (69) vs. 470 (38)      | <0.0001    |
| Rapid response call      | 113/280 (40)          | <0.0001    | 15 (22) vs. 267 (11)       | 0.009      | 98 (46) vs. 409 (38)      | 0.021      |
| Weekend admissions       | 116/440 (26)          | 0.0013     | 33 (15) vs. 249 (11)       | 0.074      | 83 (39) vs. 424 (39)      | 0.94       |
| Evening admissions       | 156/630 (25)          | 0.0042     | 39 (15) vs. 243 (11)       | 0.241      | 117 (36) vs. 390 (40)     | 0.151      |
| Severe sepsis/shock      | 198/831 (24)          | 0.0075     | 63 (13) vs. 219 (11)       | 0.125      | 135 (39) vs. 372 (39)     | 0.95       |
| ICU Readmission          | 208/704 (30)          | <0.0001    | 82 (20) vs. 200 (9.3)      | <0.0001    | 126 (43) vs. 381 (38)     | 0.118      |

\* Significance level by Fisher's exact test

**Table S3.** Multivariable analysis of clinical characteristics and mortality of ICU patients

| <i>A. All patients 90-day mortality</i>      |           |           |                |                   |
|----------------------------------------------|-----------|-----------|----------------|-------------------|
| <b>Variable</b>                              | <b>OR</b> | <b>SE</b> | <b>95% CI</b>  | <b>P &gt; [z]</b> |
| LOS Strata                                   | 1.35      | 0.05      | 1.245 - 1.46   | 0.0000            |
| Age Strata                                   | 1.83      | 0.12      | 1.616 - 2.071  | 0.0000            |
| ICU Readmission                              | 1.59      | 0.19      | 1.253 - 2.015  | 0.0000            |
| Medical vs. Surgical                         | 6.25      | 0.70      | 5.025 - 7.778  | 0.0000            |
| RRT                                          | 1.46      | 0.23      | 1.074 - 1.989  | 0.0160            |
| Code Blue                                    | 6.50      | 1.91      | 3.657 - 11.561 | 0.0000            |
| 24-hr Delay Admit                            | 0.98      | 0.15      | 0.73 - 1.313   | 0.8870            |
| <i>B. All patients 365-day mortality</i>     |           |           |                |                   |
| <b>Variable</b>                              | <b>OR</b> | <b>SE</b> | <b>95% CI</b>  | <b>P &gt; [z]</b> |
| LOS Strata                                   | 1.24      | 0.05      | 1.156 - 1.333  | 0.0000            |
| Age Strata                                   | 1.72      | 0.09      | 1.543 - 1.911  | 0.0000            |
| ICU Readmission                              | 1.65      | 0.17      | 1.346 - 2.021  | 0.0000            |
| Medical vs.. Surgical                        | 4.72      | 0.42      | 3.955 - 5.63   | 0.0000            |
| RRT                                          | 1.26      | 0.18      | 0.949 - 1.682  | 0.1090            |
| Code Blue                                    | 4.07      | 1.17      | 2.308 - 7.162  | 0.0000            |
| 24-hr Delay Admit                            | 1.08      | 0.14      | 0.833 - 1.39   | 0.5740            |
| <i>C. Medical patients 90-day mortality</i>  |           |           |                |                   |
| <b>Variable</b>                              | <b>OR</b> | <b>SE</b> | <b>95% CI</b>  | <b>P &gt; [z]</b> |
| LOS Strata                                   | 1.32      | 0.07      | 1.2 - 1.457    | 0.000             |
| Code Blue                                    | 5.14      | 1.60      | 2.793 - 9.456  | 0.000             |
| RRT                                          | 1.39      | 0.23      | 0.996 - 1.933  | 0.053             |
| 24-hr Delay Admit                            | 0.80      | 0.14      | 0.574 - 1.116  | 0.189             |
| Age Strata                                   | 1.74      | 0.13      | 1.5 - 2.011    | 0.000             |
| <i>D. Medical patients 365-day mortality</i> |           |           |                |                   |
| <b>Variable</b>                              | <b>OR</b> | <b>SE</b> | <b>95% CI</b>  | <b>P &gt; [z]</b> |
| LOS Strata                                   | 1.25      | 0.06      | 1.137 - 1.371  | 0.000             |
| Code Blue                                    | 3.16      | 0.98      | 1.729 - 5.791  | 0.000             |
| RRT                                          | 1.25      | 0.20      | 0.904 - 1.703  | 0.181             |
| 24-hr Delay Admit                            | 0.849     | 0.13      | 0.625 - 1.154  | 0.295             |
| Age Strata                                   | 1.74      | 0.12      | 1.516 - 2      | 0.000             |

**Table S3, continued***E. Surgical patients 90-day mortality*

| <b>Variable</b>   | <b>OR</b> | <b>SE</b> | <b>95% CI</b>  | <b>P &gt; [z]</b> |
|-------------------|-----------|-----------|----------------|-------------------|
| LOS Strata        | 1.36      | 0.10      | 1.178 - 1.558  | 0.000             |
| Age Strata        | 1.95      | 0.23      | 1.557 - 2.447  | 0.000             |
| ICU Readmission   | 2.35      | 0.47      | 1.592 - 3.476  | 0.000             |
| PM Admission      | 1.35      | 0.33      | 0.841 - 2.183  | 0.212             |
| RRT               | 1.50      | 0.59      | 0.699 - 3.241  | 0.297             |
| 24-hr Delay Admit | 1.62      | 0.46      | 0.924 - 2.84   | 0.092             |
| Code Blue         | 14.78     | 9.61      | 4.132 - 52.842 | 0.000             |

*F. Surgical patients 365-day mortality*

| <b>Variable</b>   | <b>OR</b> | <b>SE</b> | <b>95% CI</b> | <b>P &gt; [z]</b> |
|-------------------|-----------|-----------|---------------|-------------------|
| LOS Strata        | 1.21      | 0.07      | 0.001 - 1.083 | 0.0010            |
| Age Strata        | 1.63      | 0.14      | 0 - 1.374     | 0.0000            |
| ICU Readmission   | 2.20      | 0.33      | 0 - 1.641     | 0.0000            |
| PM Admission      | 1.04      | 0.20      | 0.839 - 0.712 | 0.8390            |
| RRT               | 1.20      | 0.40      | 0.58 - 0.625  | 0.5800            |
| 24-hr Delay Admit | 1.63      | 0.36      | 0.025 - 1.063 | 0.0250            |

Abbreviations: LOS, length of stay; ICU, intensive care unit; RRT, Renal replacement therapy; PM, night time; OR, odds ratio; SE, standard error; CI, confidence interval; P, P value measure of statistical significance.
